# Supplementary material
Source: PubMed Central journal article supplement (PMC7489426)
Supplement: jamapediatr-e203182-s001.pdf [file jamapediatr-e203182-s001.pdf]

## Supplementary Online Content

Moe CA, Haviland MJ, Bowen AG, Rowhani-Rahar A, Rivara FP. Association of minimum age laws for handgun purchase and possession with homicides perpetrated by young adults aged 18 to 20 years. *JAMA Pediatr*. Published online August 31, 2020.  
doi:10.1001/jamapediatrics.2020.3182

**eTable.** Incidence Rate Differences for the Association of Minimum Age Laws With Homicides Perpetrated by Youth Aged 18 to 20 Years

This supplementary material has been provided by the authors to give readers additional information about their work.

**eTable.** Incidence Rate Differences for the Association of Minimum Age Laws With Homicides Perpetrated by Youth Aged 18 to 20 Years

|                             | <b>Firearm homicide<br/>IRD (95% CI)</b> | <b>Non-firearm homicide<br/>IRD (95% CI)</b> |
|-----------------------------|------------------------------------------|----------------------------------------------|
| Crude model                 | 0.09 (-0.05, 0.23)                       | -0.01 (-0.05, 0.03)                          |
| Adjusted model <sup>1</sup> | 0.08 (-0.05, 0.22)                       | 0.003 (-0.03, 0.03)                          |

<sup>1</sup> Adjusted for proportion of the population that is male, black, Hispanic, lives in rural areas, and is unemployed, the poverty rate, ratio of adult firearm suicide to suicide, per capita alcohol consumption among persons 14 and older, law establishing minimum age of 18 to purchase a long gun, law requiring universal background check to purchase a handgun, law requiring a universal background check to obtain a permit to purchase a handgun
